# Supplementary material for: Effects of Hydrolysis Condition and Detection Method on the Monosaccharide Composition Analysis of Polysaccharides from Natural Sources
Source: MDPI journal article supplement (doi:10.3390/separations11010002), 2023-12-19
Supplement: s1 [file s1]

**Table S1. Information of 16 investigated monosaccharides.**

| Monosaccharide group | Molecular formula | Molecular weight (g/mol) | Chemical structure                                                                                                                                                         |
|----------------------|-------------------|--------------------------|----------------------------------------------------------------------------------------------------------------------------------------------------------------------------|
| Glc, Man, Gal        | $C_6H_{12}O_6$    | 180.16                   | $  \begin{array}{c}  \text{CHO} \\    \\  \text{OH} \\    \\  \text{HO} - \\    \\  \text{OH} \\    \\  \text{OH} \\    \\  \text{CH}_2\text{OH}  \end{array}  $           |
| Ara, Rib, Xyl        | $C_5H_{10}O_5$    | 150.13                   | $  \begin{array}{c}  \text{CHO} \\    \\  \text{OH} \\    \\  \text{HO} - \\    \\  \text{OH} \\    \\  \text{OH} \\    \\  \text{H}  \end{array}  $                       |
| Rha, Fuc             | $C_6H_{12}O_5$    | 164.16                   | $  \begin{array}{c}  \text{CHO} \\    \\  \text{OH} \\    \\  \text{HO} - \\    \\  \text{OH} \\    \\  \text{OH} \\    \\  \text{CH}_3  \end{array}  $                    |
| GlcA, GalA           | $C_6H_{10}O_7$    | 194.14                   | $  \begin{array}{c}  \text{CHO} \\    \\  \text{OH} \\    \\  \text{HO} - \\    \\  \text{OH} \\    \\  \text{OH} \\    \\  \text{COOH}  \end{array}  $                    |
| Fru                  | $C_6H_{12}O_6$    | 180.16                   | $  \begin{array}{c}  \text{CH}_2\text{OH} \\     \\  \text{O} \\    \\  \text{HO} - \\    \\  \text{OH} \\    \\  \text{OH} \\    \\  \text{CH}_2\text{OH}  \end{array}  $ |
| So-ol, Ma-ol         | $C_6H_{14}O_6$    | 182.17                   | $  \begin{array}{c}  \text{CH}_2\text{OH} \\    \\  \text{OH} \\    \\  \text{HO} - \\    \\  \text{OH} \\    \\  \text{OH} \\    \\  \text{CH}_2\text{OH}  \end{array}  $ |
| Xy-ol, Ri-ol         | $C_5H_{12}O_5$    | 152.15                   | $  \begin{array}{c}  \text{CH}_2\text{OH} \\    \\  \text{OH} \\    \\  \text{HO} - \\    \\  \text{OH} \\    \\  \text{OH} \\    \\  \text{H}  \end{array}  $             |
| GlcN                 | $C_6H_{13}NO_5$   | 179.17                   | $  \begin{array}{c}  \text{OH} \\    \\  \text{OH} \\    \\  \text{HO} - \\    \\  \text{OH} \\    \\  \text{NH}_2 \\     \\  \text{O}  \end{array}  $                     |

**Table S2. Information of 5 polysaccharides.**

| Polysaccharides | Monosaccharide types in literature | Main glycosidic bonds                                                                                | Neutral/ Acidic | Percentage composition of monosaccharides detected in this study                                                                                                         | Reference |
|-----------------|------------------------------------|------------------------------------------------------------------------------------------------------|-----------------|--------------------------------------------------------------------------------------------------------------------------------------------------------------------------|-----------|
| Inulin          | Glc, Fru                           | (2→1)-β-D-Fru                                                                                        | neutral         | Glc: Fru=57.4%: 42.6% (GC, One-step)                                                                                                                                     | [25-27]   |
| Pectin          | Rha, Ara, Gal, Glc, GalA           | (1→4)-α-D-GalA<br>(1→2)-α-Rha<br>(1→4)-β-D-Gal                                                       | acidic          | Ara: Rha: Glc: Gal: GalA=5.0%: 2.5%: 6.4%: 4.0%: 82.1% (HPLC, Two-step)                                                                                                  | [29-31]   |
| LBP             | Ara, Gal, GlcA, Rha, Glc, Xyl, Man | (1→4)-α-D-GalA<br>(1→6)-α-D-Glc<br>(1→5)-α-L-Ara<br>(1→4)-β-D-Gal<br>(1→6)-β-D-Gal                   | acidic/ neutral | Ara: Xyl: Rha: Man: Glc: Gal: GalA=15.2%: 4.3%: 7.1%: 1.2%: 4.2%: 7.1%: 60.9% (HPLC, Two-step)                                                                           | [32-34]   |
| CPP             | Ara, Rha, Gal, GalA, Glc, Man      | (2→1)-β-D-Fru<br>(1→4)-α-D-GalA<br>(1→3)-β-D-Gal<br>(1→3, 6)-β-D-Gal<br>(1→2)-β-D-Rha<br>(1→4)-D-Man | acidic          | Ara: Rha: Man: Glc: Gal: Fru=21.5%: 3.5%: 2.9%: 17.4%: 13.7%: 41.0% (GC, One-step)<br>Ara: Rha: Man: Glc: Gal: GalA=8.6%: 3.3%: 1.0%: 6.7%: 6.1%: 74.4% (HPLC, Two-step) | [35-37]   |
| GIP             | Man, Glc, Gal, Xyl, Ara, Fuc       | (1→3)-β-Glc<br>(1→6)-β-Glc                                                                           | neutral         | Xyl: Fuc: Man: Glc: Gal =3.5%: 3.9%: 9.8%: 75.4%: 7.3% (GC, One-step)                                                                                                    | [38-39]   |

**Table S3. Linearity of the HPTLC method for different carbohydrates.**

| Carbohydrates | Regression equation | R <sup>2</sup> | Linear range (µg/mL) |
|---------------|---------------------|----------------|----------------------|
| Rha           | Y=35.759X+1091.3    | 0.9210         | 52.00-208.00         |
| Xyl           | Y=50.623X+4175.0    | 0.9457         | 67.75-243.92         |
| Rib           | Y=35.956X+1628.3    | 0.9466         | 51.50-185.42         |
| Glc           | Y=48.342X+3286.0    | 0.9337         | 57.25-229.00         |
| Gal           | Y=33.526X+1865.7    | 0.9531         | 50.75-203.00         |
| GlcA          | Y=64.466X+750.12    | 0.9925         | 64.50-258.00         |
| Fuc           | Y=16.482X-102.51    | 0.9575         | 57.67-230.67         |
| Ara           | Y=85.104X+256.54    | 0.9132         | 56.75-227.00         |
| GlcN          | Y=24.848X-3091.7    | 0.9244         | 138.40-346.00        |
| GalA          | Y=57.954X+75.177    | 0.9206         | 28.58-228.67         |
| Fru           | Y=12.412X+446.26    | 0.9236         | 147.20-460.00        |
| Man           | Y=27.159X-545.43    | 0.9105         | 69.00-345.00         |

**Table S4. Linearity and accuracy of the HPLC method for different carbohydrates.**

| Carbohydrates | Regression equation | R <sup>2</sup> | Linear range (µg/mL) | LOD (µg/mL) | LOQ (µg/mL) | Accuracy (%) |
|---------------|---------------------|----------------|----------------------|-------------|-------------|--------------|
| Man           | Y=19313X-55621      | 0.9990         | 3.10-298             | 0.19        | 0.63        | 93.8         |
| Rib           | Y=18970X+44464      | 0.9994         | 3.15-302             | 0.22        | 0.73        | 93.2         |
| Rha           | Y=16503X+34800      | 0.9994         | 3.39-325             | 0.26        | 0.87        | 92.5         |
| GlcN          | Y=16677X-31168      | 0.9999         | 3.57-343             | 0.38        | 1.27        | 101.3        |
| GlcA          | Y=16956X-109712     | 0.9954         | 3.32-319             | 0.36        | 1.21        | 95.6         |
| GalA          | Y=17497X-97533      | 0.9970         | 3.30-317             | 0.42        | 1.39        | 92.3         |
| Glc           | Y=17196X-44275      | 0.9977         | 3.15-302             | 0.41        | 1.36        | 91.9         |
| Gal           | Y=20272X-90571      | 0.9928         | 3.09-297             | 0.28        | 0.92        | 90.9         |
| Xyl           | Y=21645X+52498      | 0.9996         | 3.25-312             | 0.23        | 0.76        | 92.8         |
| Ara           | Y=23664X-64558      | 0.9980         | 3.18-305             | 0.24        | 0.81        | 90.6         |
| Fuc           | Y=11696X+29253      | 0.9971         | 3.04-292             | 0.39        | 1.29        | 91.1         |

**Table S5. Precision for HPLC method.**

| Carbohydrates | Low concentration/(25 µg/mL) |          |                           |          | Medium concentration/(50 µg/mL) |          |                           |          | High concentration/(100 µg/mL) |          |                           |          |
|---------------|------------------------------|----------|---------------------------|----------|---------------------------------|----------|---------------------------|----------|--------------------------------|----------|---------------------------|----------|
|               | Peak area<br>(% RSD)         |          | Retention time<br>(% RSD) |          | Peak area<br>(% RSD)            |          | Retention time<br>(% RSD) |          | Peak area<br>(% RSD)           |          | Retention time<br>(% RSD) |          |
|               | intraday                     | interday | intraday                  | interday | intraday                        | interday | intraday                  | interday | intraday                       | interday | intraday                  | interday |
|               | (n=6)                        | (n=6)    | (n=6)                     | (n=6)    | (n=6)                           | (n=6)    | (n=6)                     | (n=6)    | (n=6)                          | (n=6)    | (n=6)                     | (n=6)    |
| Man           | 0.81                         | 2.17     | 0.25                      | 0.46     | 0.60                            | 2.56     | 0.42                      | 0.46     | 0.89                           | 3.78     | 0.25                      | 0.55     |
| Rib           | 0.63                         | 2.10     | 0.42                      | 0.55     | 0.23                            | 4.06     | 0.50                      | 0.66     | 0.61                           | 2.10     | 0.27                      | 0.61     |
| Rha           | 1.15                         | 2.61     | 0.58                      | 0.57     | 0.29                            | 6.16     | 0.43                      | 0.74     | 0.68                           | 6.97     | 0.22                      | 0.71     |
| GlcN          | 1.66                         | 3.33     | 0.36                      | 0.25     | 0.59                            | 3.50     | 0.42                      | 0.33     | 1.07                           | 2.75     | 0.31                      | 0.37     |
| GlcA          | 2.06                         | 6.80     | 0.60                      | 0.58     | 1.09                            | 6.44     | 0.63                      | 0.62     | 0.78                           | 4.14     | 0.37                      | 0.66     |
| GalA          | 2.92                         | 6.01     | 0.51                      | 0.61     | 1.46                            | 6.06     | 0.48                      | 0.61     | 0.67                           | 5.69     | 0.47                      | 0.72     |
| Glc           | 1.32                         | 8.64     | 0.23                      | 0.40     | 3.71                            | 4.86     | 0.42                      | 0.53     | 1.59                           | 6.08     | 0.31                      | 0.65     |
| Gal           | 1.50                         | 5.02     | 0.20                      | 0.31     | 0.10                            | 8.50     | 0.24                      | 0.27     | 0.65                           | 5.58     | 0.22                      | 0.37     |
| Xyl           | 1.60                         | 3.77     | 0.18                      | 0.25     | 0.62                            | 6.47     | 0.20                      | 0.25     | 1.68                           | 5.20     | 0.17                      | 0.26     |
| Ara           | 3.29                         | 8.33     | 0.28                      | 0.18     | 0.73                            | 7.08     | 0.25                      | 0.21     | 0.93                           | 3.98     | 0.22                      | 0.24     |
| Fuc           | 3.40                         | 12.11    | 0.17                      | 0.33     | 1.18                            | 13.83    | 0.16                      | 0.32     | 1.43                           | 13.04    | 0.17                      | 0.31     |

**Table S6. Linearity and accuracy of the GC-MS method for different carbohydrates.**

| Carbohydrates | Regression equation | R <sup>2</sup> | Linear range (µg/mL) | LOD (µg/mL) | LOQ (µg/mL) | Accuracy (%) |
|---------------|---------------------|----------------|----------------------|-------------|-------------|--------------|
| Rib           | Y=0.0038X-0.0154    | 0.9967         | 3.36-215.33          | 0.58        | 1.93        | 84.4         |
| Ara           | Y=0.0034X-0.0105    | 0.9980         | 3.19-204.00          | 0.34        | 1.13        | 88.2         |
| Xyl           | Y=0.0041X-0.0141    | 0.9978         | 3.51-224.67          | 0.12        | 0.41        | 86.3         |
| Ri-ol         | Y=0.0083X-0.0319    | 0.9982         | 3.21-205.33          | 0.33        | 1.10        | 92.6         |
| Xy-ol         | Y=0.0083X-0.0355    | 0.9980         | 3.35-214.67          | 0.23        | 0.77        | 89.9         |
| Ma-ol         | Y=0.0070X-0.0290    | 0.9989         | 3.23-206.67          | 0.30        | 1.00        | 95.9         |
| So-ol         | Y=0.0070X-0.0281    | 0.9989         | 3.32-212.67          | 0.80        | 2.68        | 94.1         |
| Rha           | Y=0.0037X-0.0124    | 0.9977         | 3.14-200.67          | 0.26        | 0.86        | 88.9         |
| Fuc           | Y=0.0024X-0.0072    | 0.9985         | 3.25-208.00          | 0.14        | 0.47        | 99.9         |
| Man           | Y=0.0038X-0.0175    | 0.9983         | 3.54-226.67          | 0.27        | 0.90        | 95.3         |
| Glc           | Y=0.0044X-0.0220    | 0.9980         | 3.49-222.33          | 0.19        | 0.62        | 92.8         |
| Gal           | Y=0.0037X-0.0173    | 0.9979         | 3.28-210.00          | 0.25        | 0.85        | 92.9         |
| Fru           | Y=0.0019X-0.0004    | 0.9995         | 3.36-107.67          | 0.31        | 1.02        | 97.3         |

**Table S7. Precision for GC-MS method.**

| Carbohydrates | Low concentration/(25 µg/mL) |          |                           |          | Medium concentration/(50 µg/mL) |          |                           |          | High concentration/(100 µg/mL) |          |                           |          |
|---------------|------------------------------|----------|---------------------------|----------|---------------------------------|----------|---------------------------|----------|--------------------------------|----------|---------------------------|----------|
|               | Peak area<br>(% RSD)         |          | Retention time<br>(% RSD) |          | Peak area<br>(% RSD)            |          | Retention time<br>(% RSD) |          | Peak area<br>(% RSD)           |          | Retention time<br>(% RSD) |          |
|               | intraday                     | interday | intraday                  | interday | intraday                        | interday | intraday                  | interday | intraday                       | interday | intraday                  | interday |
|               | (n=6)                        | (n=6)    | (n=6)                     | (n=6)    | (n=6)                           | (n=6)    | (n=6)                     | (n=6)    | (n=6)                          | (n=6)    | (n=6)                     | (n=6)    |
| Rib           | 2.04                         | 4.45     | 0.03                      | 0.20     | 5.65                            | 4.20     | 0.07                      | 0.07     | 2.81                           | 5.00     | 0.03                      | 0.07     |
| Ara           | 2.66                         | 4.86     | 0.03                      | 0.15     | 5.56                            | 3.80     | 0.08                      | 0.06     | 2.74                           | 4.47     | 0.04                      | 0.07     |
| Xyl           | 1.73                         | 4.36     | 0.02                      | 0.14     | 5.78                            | 4.06     | 0.07                      | 0.05     | 2.51                           | 3.61     | 0.03                      | 0.08     |
| Ri-ol         | 1.19                         | 1.89     | 0.03                      | 0.10     | 4.25                            | 2.21     | 0.09                      | 0.05     | 1.02                           | 2.43     | 0.03                      | 0.07     |
| Xy-ol         | 1.83                         | 2.14     | 0.02                      | 0.09     | 3.63                            | 2.02     | 0.09                      | 0.05     | 0.67                           | 2.21     | 0.02                      | 0.07     |
| Ma-ol         | 3.36                         | 4.23     | 0.01                      | 0.03     | 3.25                            | 4.80     | 0.03                      | 0.02     | 1.17                           | 1.44     | 0.02                      | 0.03     |
| So-ol         | 4.49                         | 5.11     | 0.01                      | 0.03     | 2.86                            | 4.14     | 0.03                      | 0.01     | 1.08                           | 2.50     | 0.02                      | 0.04     |
| Rha           | 2.66                         | 5.16     | 0.03                      | 0.18     | 5.51                            | 3.89     | 0.08                      | 0.05     | 2.78                           | 6.07     | 0.03                      | 0.06     |
| Fuc           | 2.64                         | 5.72     | 0.03                      | 0.13     | 4.99                            | 3.53     | 0.08                      | 0.05     | 2.77                           | 6.33     | 0.03                      | 0.07     |
| Man           | 3.02                         | 4.67     | 0.02                      | 0.07     | 4.71                            | 3.66     | 0.08                      | 0.03     | 2.33                           | 2.87     | 0.03                      | 0.05     |
| Glc           | 3.11                         | 4.81     | 0.02                      | 0.07     | 4.04                            | 3.69     | 0.07                      | 0.02     | 2.13                           | 1.87     | 0.02                      | 0.04     |
| Gal           | 2.24                         | 4.01     | 0.02                      | 0.05     | 3.40                            | 3.37     | 0.06                      | 0.02     | 2.51                           | 3.04     | 0.02                      | 0.04     |
| Fru           | 1.37                         | 3.24     | 0.02                      | 0.04     | 0.87                            | 0.87     | 0.04                      | 0.04     | 3.60                           | 4.63     | 0.01                      | 0.03     |
